# Supplementary material
Source: Springer Nature journal article supplement (https://www.springermedizin.de/resource/supplementary/12885_2013_4153_MOESM12_ESM.pdf/9465582)

**A****Normalized and Shifted Melting Curves**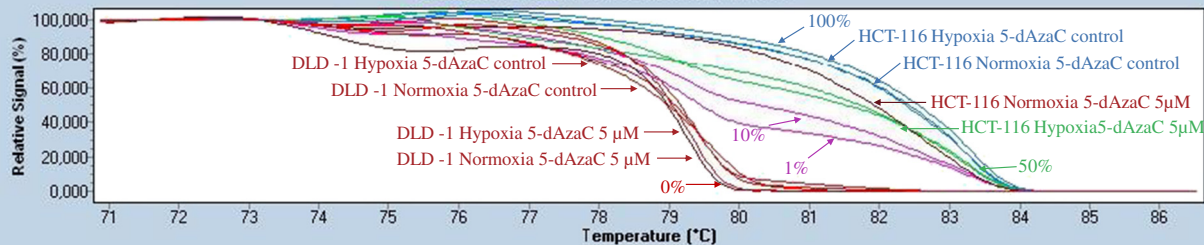**B****Normalized and Shifted Melting Curves**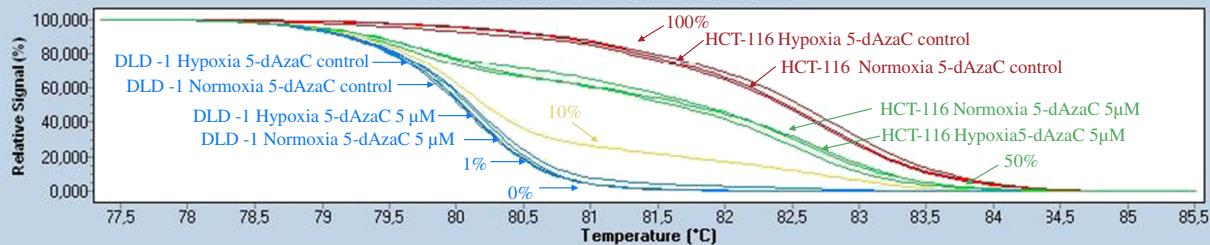**C****Normalized and Shifted Melting Curves**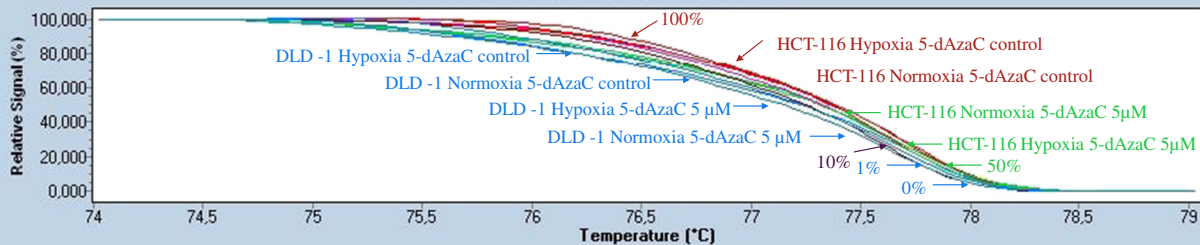

Supplement: MOESM12 [file 9465582]
